# Supplementary material
Source: PubMed Central journal article supplement (PMC4097442)
Supplement: CVI.00196-14_zcd999095026so1.pdf [file CVI.00196-14_zcd999095026so1.pdf]

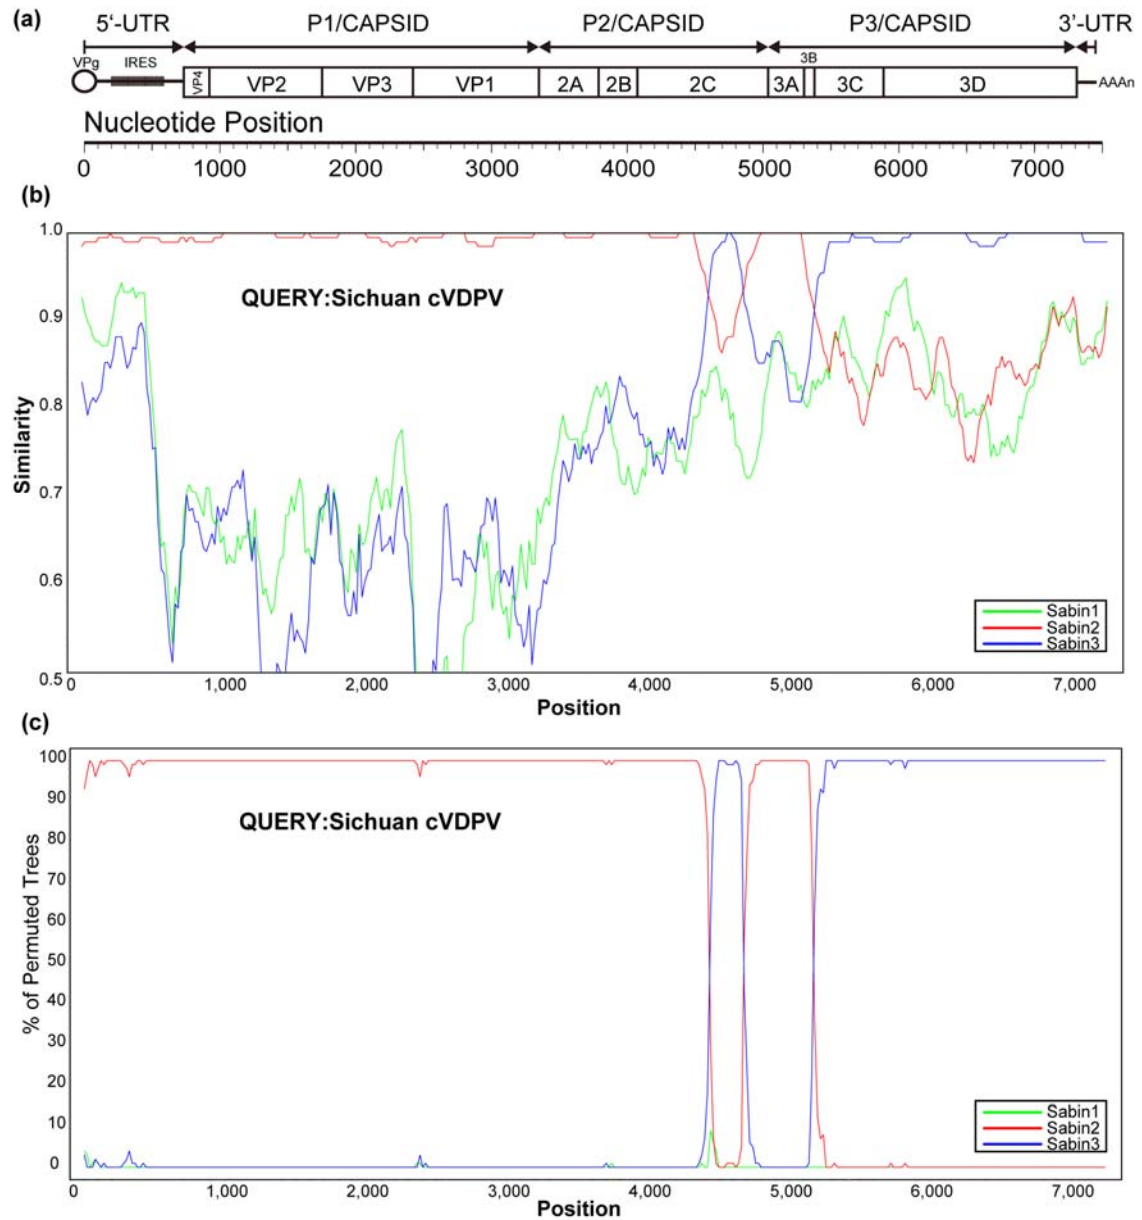

Figure S1. (a) Similarity plot and (b) bootscanning analysis of Sichuan type 2 cVDPV genomes, using a sliding window of 200 nt moving in 20-nt steps. The Sichuan cVDPV strain was used as a query sequence and it is indicated in the upper left corner of the image.

|              | VP2   |            |      |          |           |    | VP3         |          |       | VP1   |      |       |
|--------------|-------|------------|------|----------|-----------|----|-------------|----------|-------|-------|------|-------|
|              | NAg3b |            | NAg2 |          | NAg2      |    | NAg3a       | NAg3a    | NAg3b | NAg1  | NAg2 | NAg3a |
|              | 71    | 163        | 268  | 54       | 70        | 88 | 222         | 287      |       |       |      |       |
| Sabin 2      | WRK   | DTNATNPARN | PRT  | PLNLTSQR | VELSDTAHS | DT | AIIEVDNDAPT | KRASRLFS | STEGD | KDGLT |      |       |
| CHN15261     | .     | .          | .    | .        | .         | .  | .           | .        | .     | .     | .    | .     |
| CHN15284     | .     | .          | .    | .        | .         | .  | .           | .        | .     | .     | .    | .     |
| CHN16003     | .     | .          | .    | .        | .         | .  | .           | .        | .     | .     | .    | .     |
| CHN16017     | .     | .          | .    | .        | .         | .  | .           | .        | .     | .     | .    | .     |
| CHN16019c    | .     | .          | .    | .        | .         | .  | .           | .        | .     | .     | .    | .     |
| EGY88-074    | .     | .          | .    | .        | .         | .  | .           | .        | .     | .     | .    | .     |
| EGY93-034    | .     | .          | .    | .        | .         | .  | .           | .        | .     | .     | .    | .     |
| MAD004       | .     | .          | .    | .        | .         | .  | .           | .        | .     | .     | .    | .     |
| MAD029       | .     | .          | .    | .        | .         | .  | .           | .        | .     | .     | .    | .     |
| JIS06-01-NIE | .     | .          | .    | .        | .         | .  | .           | .        | .     | .     | .    | .     |
| KBS08-03-NIE | .     | .          | .    | .        | .         | .  | .           | .        | .     | .     | .    | .     |
| BAS05-01-NIE | .     | .          | .    | .        | .         | .  | .           | .        | .     | .     | .    | .     |
| NIS11-01-NIE | .     | .          | .    | .        | .         | .  | .           | .        | .     | .     | .    | .     |
| MEF-1        | .     | .          | .    | .        | .         | .  | .           | .        | .     | .     | .    | .     |

Figure S2. Alignment of amino acid residues of neutralizing antigenic (NAg) sites 1 (*VP1*: 88–106), 2 (*VP2*: 163–172; *VP2*: 268–270; *VP1*: 222–227), 3a (*VP3*: 54–61; *VP3*: 70–74; *VP1*: 287–292), and 3b (*VP2*: 71–73; *VP3*: 75–80) for Sabin 2, Sichuan cVDPV strains, Egypt type 2 cVDPV strains (GenBank numbers: AF448782 and AF448783), Madagascar type 2 cVDPV strains (GenBank numbers: AM084223 and AM084225), Spain type 2 iVDPV strains (GenBank numbers: EU566941 and EU566950), and the prototype wild type 2 poliovirus strain, MEF-1/EGY/1942.
